# Supplementary material for: Hydrophilic sulfonic acid-functionalized micro-bead silica for dehydration of sorbitol to isosorbide
Source: Royal Society of Chemistry journal article supplement (doi:10.1039/c5ra27510e), 2016-01-01
Supplement: c5ra27510e1.pdf [file c5ra27510e1.pdf]

## *Supporting information*

### **Hydrophilic Sulfonic Acid-Functionalized Micro-Bead Silica for Dehydration of Sorbitol to Isosorbide**

Jun Shi, Yuhua Shan\*, Yuan Tian, Yu Wan, Yitian Zheng and Yangyang Feng

Advanced catalysis and Green Manufacturing Collaborative Innovation Center,  
Changzhou University, Changzhou 213164, China

**Table S1** Results of elemental analysis for different SA-SiO<sub>2</sub> catalysts.

| Entry | Sample code               | $\omega$ (MPTS loading)/% | C/%         | H/%       | S/%         |
|-------|---------------------------|---------------------------|-------------|-----------|-------------|
| 1     | Silica-gel                | 0                         | 0.10 (0)    | 0.19 (0)  | 0 (0)       |
| 2     | SA-SiO <sub>2</sub> -10.6 | 10.6                      | 2.4 (2.5)   | 0.5 (0.5) | 2.2 (2.3)   |
| 3     | SA-SiO <sub>2</sub> -22.5 | 22.5                      | 5.6 (5.4)   | 1.1 (1.0) | 4.8 (4.8)   |
| 4     | SA-SiO <sub>2</sub> -33.1 | 33.1                      | 7.9 (7.9)   | 1.4 (1.5) | 7.2 (7.0)   |
| 5     | SA-SiO <sub>2</sub> -40.9 | 40.9                      | 9.8 (9.7)   | 1.9 (1.9) | 8.8 (8.7)   |
| 6     | SA-SiO <sub>2</sub> -52.0 | 52.0                      | 12.1 (12.4) | 2.6 (2.4) | 10.9 (11.0) |
| 7     | SA-SiO <sub>2</sub> -60.5 | 60.5                      | 14.5 (14.4) | 2.7 (2.8) | 13.0 (12.8) |
| 8     | SA-SiO <sub>2</sub> -71.9 | 71.9                      | 17.1 (17.1) | 3.3 (3.3) | 15.1 (15.2) |
| 9     | SA-SiO <sub>2</sub> -83.3 | 83.3                      | 19.8 (19.8) | 3.8 (3.9) | 17.8 (17.7) |

**Table S2** Catalyst activity of various reported hydrophilic catalysts used for dehydration of sorbitol to isosorbide.

| Catalyst                                       | Temperature (°C) | Time (h) | Conv (%) <sup>a</sup> | Yield (%) <sup>b</sup> |
|------------------------------------------------|------------------|----------|-----------------------|------------------------|
| Sulfated tin oxide <sup>1</sup>                | 180              | 2        | 100                   | 65                     |
| sulfated zirconia <sup>2</sup>                 | 210              | 2        | 100                   | 61                     |
| boron phosphate <sup>3</sup>                   | 220              | 24       | 100                   | 72.3                   |
| Zr(SO <sub>4</sub> ) <sub>2</sub> <sup>4</sup> | 160              | 60       | 100                   | 65                     |
| Ti(SO <sub>4</sub> ) <sub>2</sub> <sup>4</sup> | 160              | 60       | 100                   | 68                     |
| CuSO-650 <sup>5</sup>                          | 200              | 4h       | 99.7                  | 67.3                   |

<sup>a</sup> Conversion of sorbitol. <sup>b</sup> Yield of isosorbide.

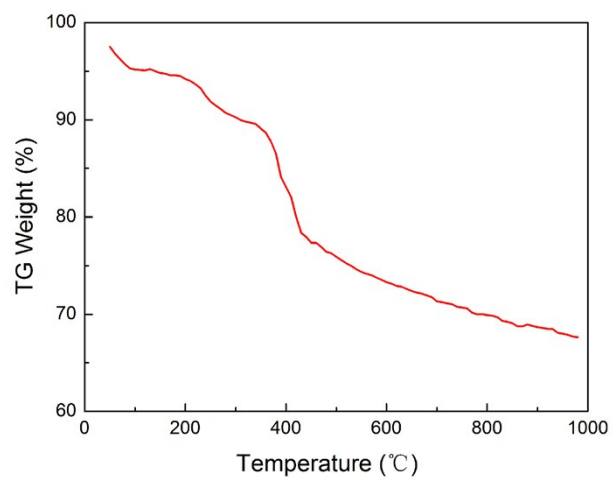

**Fig. S1** Thermogravimetric analysis (TGA) curves of SA-SiO<sub>2</sub>-60.5 catalyst used after tenth runs.

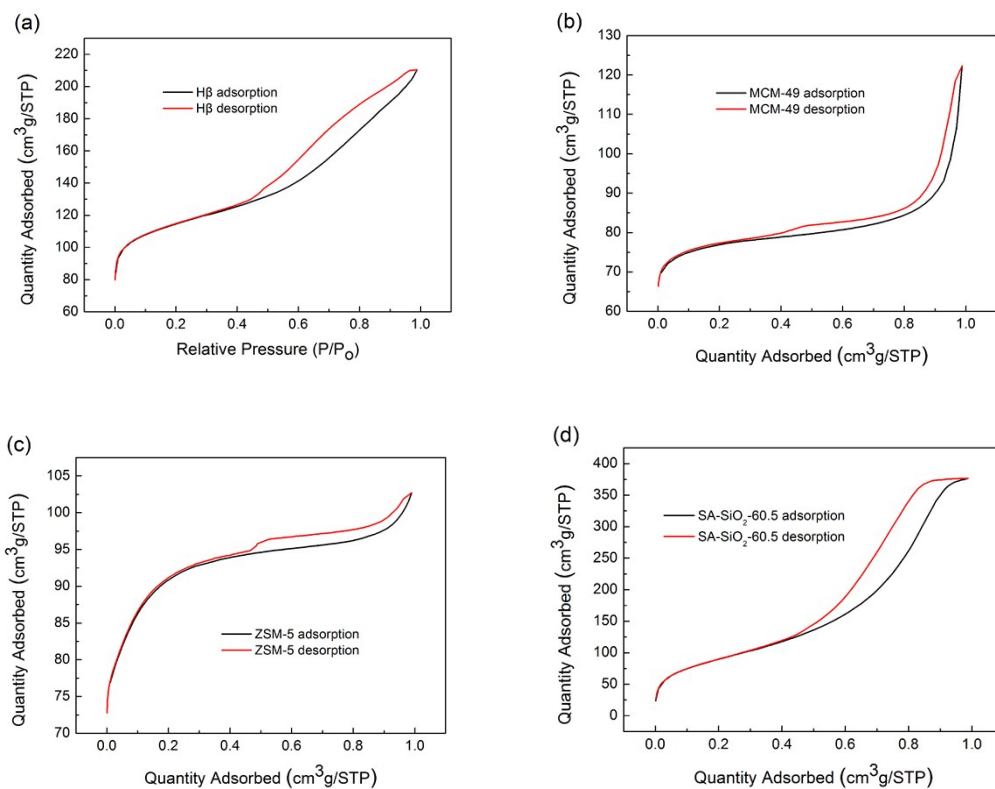

**Fig. S2**  $N_2$  adsorption and desorption isotherms of H $\beta$  (a), MCM-49 (b), HZSM-5 (c) and SA-SiO $_2$ -60.5 (d).

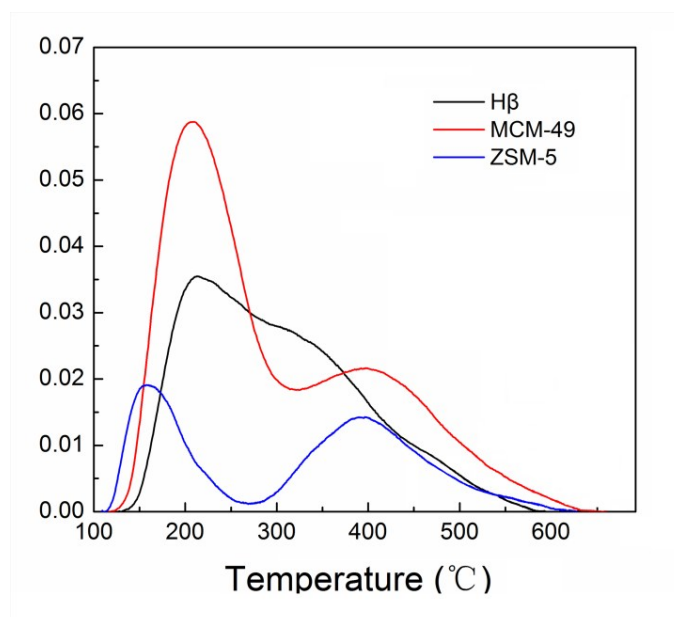

**Fig. S3** NH<sub>3</sub>-TPD profile of the H $\beta$ , MCM-49 and ZSM-5 zeolites.

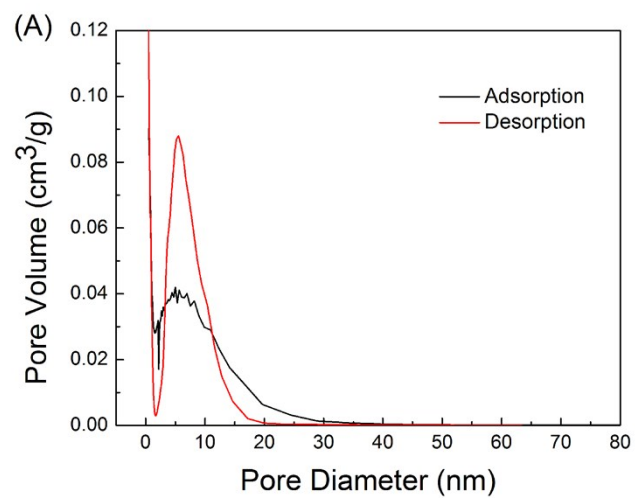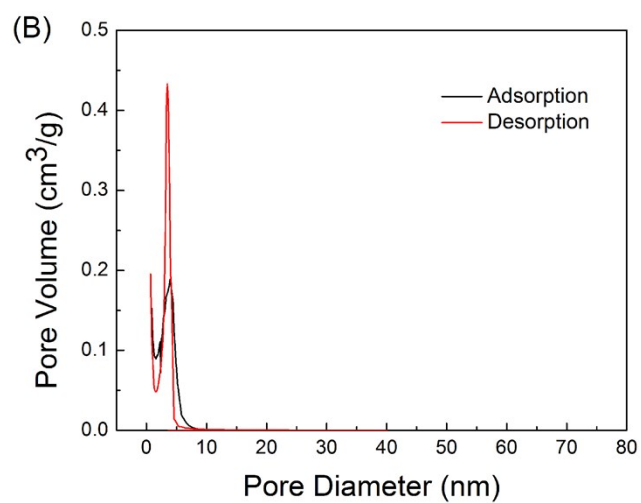

**Fig. S4** Pore size distributions (BJH Adsorption/Desorption  $dV/dD$  Pore Volume) of used SA-SiO<sub>2</sub>-60.5 (A) and SBA-15-SO<sub>3</sub>H (B).

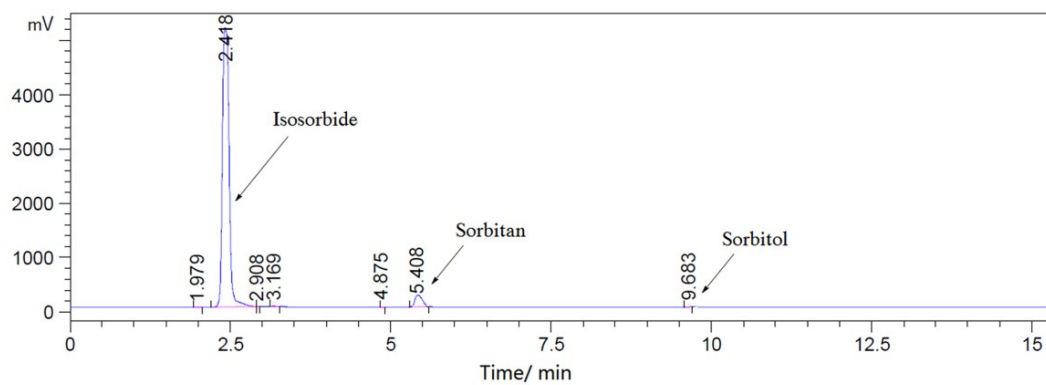

**Fig. S5** Typical HPLC pattern of dehydration of sorbitol in solvent free condition. (Reaction condition: 50 g sorbitol, 1.0 g SA-SiO<sub>2</sub>-60.5 catalyst, 120 °C, 10 h, 1000 Pa (abs)).

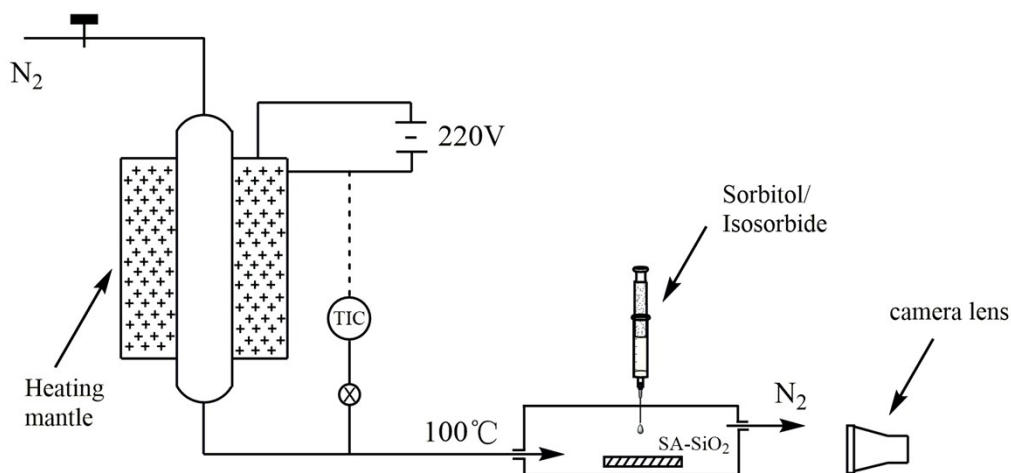

**Fig. S6** Diagram of the process of measuring the contact angle.

## Reference

1. A. A. Dabbawala, D. K. Mishra and J.-S. Hwang, *Catalysis Communications*, 2013, **42**, 1-5.
2. N. A. Khan, D. K. Mishra, I. Ahmed, J. W. Yoon, J.-S. Hwang and S. H. Jung, *Applied Catalysis A: General*, 2013, **452**, 34-38.
3. O. A. Rusu, W. F. Hoelderich, H. Wyart and M. Ibert, *Applied Catalysis B: Environmental*, 2015, **176-177**, 139-149.
4. A. A. Dabbawala, D. K. Mishra, G. W. Huber and J.-S. Hwang, *Applied Catalysis A: General*, 2015, **492**, 252-261.
5. J. Xia, D. Yu, Y. Hu, B. Zou, P. Sun, H. Li and H. Huang, *Catalysis Communications*, 2011, **12**, 544-547.
